# Supplementary material for: Utility of Antioxidants in the Treatment of Male Infertility: Clinical Guidelines Based on a Systematic Review and Analysis of Evidence
Source: PubMed Central journal article supplement — World J Mens Health. 2021 Jan 15;39(2):233–90. doi: 10.5534/wjmh.200196 (PMC7994666; doi:10.5534/wjmh.200196), 2021-01-15
Supplement: wjmh-39-233-s001.pdf [file wjmh-39-233-s001.pdf]

**Supplement Table 1.** 'AND NOT' Boolean operators additionally included in the keywords string to exclude animal studies

|         |                                                                                                                                                                                                                                                                                                                                                                                                                                                                                                                                                                                                                                                                                                                                                                                                                                                                                                                                                                                                                                                                                                                                                                                                                                                                                                                                                                                                                                                                                                                                                                                                                                                                                                                                                                                                                                                                                                                                                                                                                                                                                                                                                                                                                                                                                                                                                                                                                                                                                                                                                               |
|---------|---------------------------------------------------------------------------------------------------------------------------------------------------------------------------------------------------------------------------------------------------------------------------------------------------------------------------------------------------------------------------------------------------------------------------------------------------------------------------------------------------------------------------------------------------------------------------------------------------------------------------------------------------------------------------------------------------------------------------------------------------------------------------------------------------------------------------------------------------------------------------------------------------------------------------------------------------------------------------------------------------------------------------------------------------------------------------------------------------------------------------------------------------------------------------------------------------------------------------------------------------------------------------------------------------------------------------------------------------------------------------------------------------------------------------------------------------------------------------------------------------------------------------------------------------------------------------------------------------------------------------------------------------------------------------------------------------------------------------------------------------------------------------------------------------------------------------------------------------------------------------------------------------------------------------------------------------------------------------------------------------------------------------------------------------------------------------------------------------------------------------------------------------------------------------------------------------------------------------------------------------------------------------------------------------------------------------------------------------------------------------------------------------------------------------------------------------------------------------------------------------------------------------------------------------------------|
| AND NOT | TITLE-ABS-KEY ("arbacia punctulata" OR "drosophila*" OR "bull*" OR "gerbil*" OR "scallop*" OR "boar*" OR "quail*" OR "sea urchin*" OR "mussel" OR "salmon*" OR "salmonid" OR "equine*" OR "stallion*" OR "horse*" OR "cardiac cells" OR "avian" OR "xenopus" OR "monkey*" OR "insect*" OR "prawn*" OR "tilapia" OR "Mytilus" OR "moths" OR "Anisopteromalus calandrae" OR "Hymenopter*" OR "crayfish*" OR "Dinophyceae" OR "invertebrate" OR "duck" OR "cockerel*" OR "ram" OR "rodent*" OR "chinchilla*" OR "cricket*" OR "alpaca*" OR "sparrow*" OR "herring*" OR "eel" OR "lizard*" OR "fowl" OR "sheep*" OR "goat*" OR "abalone" OR "rabbit*" OR "fish" OR "fishes" OR "lamb" OR "chicken*" OR "cow" OR "cows" OR "rooster*" OR "bovine" OR "bovinae" OR "buffalo*" OR "elephant*" OR "donkey*" OR "frog" OR "cod gadus" OR "snail*" OR "bos taurus" OR "tridacnid clams" OR "cattle" OR "arctic char" OR "Gallus gallus" OR "hamster*" OR "koala" OR "turkey*" OR "buck" OR "trout*" OR "pig" OR "swine" OR "sea bass" OR "striped bass" OR "earthworms" OR "zebrafish" OR "teleost" OR "danio rerio" OR "panthera leo" OR "Equus caballus" OR "cat" OR "deer" OR "protozoan*" OR "capra hircus" OR "catfish" OR "Solea senegalensis" OR "Sapindus mukorossi" OR "Caenorhabditis elegans" OR "saccharomyces cerevisiae" OR "Arabidopsis" OR "ciona intestinalis" OR "blanca celtiberica" OR "Ostrea rivularis" OR "Carollia perspicillata" OR "canine" OR "dog*" OR "sturgeon" OR "apis mellifera" OR "acipenser ruthenus" OR "Sinopotamon henanense" OR "rhesus macaque" OR "Swedish red" OR "pagrus major" OR "Dicentrarchus labrax" OR "Acropora surculosa" OR "Anopheles gambiae" OR "Aedes albopictus" OR "Teleogryllus oceanicus" OR "tinca tinca" OR "Trionyx sinensis" OR "Spodoptera litura" OR "Corynorhinus mexicanus" OR "musculista senhousia" OR "Bombyx mori" OR "Gasterosteus" OR "Hirundo rustica" OR "Sparus aurata" OR "Galeolaria caespitosa" OR "Portunus trituberculatus" OR "Vicugna pacos" OR "Canis lupus" OR "Poecilia reticulata" OR "Plutella xylostella" OR "Epinephelus marginatus" OR "serpulid*" OR "Chrysomus ruficapillus" OR "Podospora anserine" OR "Haliotis midae" OR "Bos frontalis" OR "Procambarus clarkii" OR "Crematogaster osakensis" OR "Misgurnus anguillicaudatus" OR "Mesocricetus auratus" OR "Oncorhynchus mykiss" OR "Cyprinus carpio" OR "ovine" OR "caprine" OR "oyster" OR "aves" OR "red seabream" OR "parus major" OR "honey bee drones" OR "Podospora anserina" OR "rats" OR "mice" OR "mouse") |
|---------|---------------------------------------------------------------------------------------------------------------------------------------------------------------------------------------------------------------------------------------------------------------------------------------------------------------------------------------------------------------------------------------------------------------------------------------------------------------------------------------------------------------------------------------------------------------------------------------------------------------------------------------------------------------------------------------------------------------------------------------------------------------------------------------------------------------------------------------------------------------------------------------------------------------------------------------------------------------------------------------------------------------------------------------------------------------------------------------------------------------------------------------------------------------------------------------------------------------------------------------------------------------------------------------------------------------------------------------------------------------------------------------------------------------------------------------------------------------------------------------------------------------------------------------------------------------------------------------------------------------------------------------------------------------------------------------------------------------------------------------------------------------------------------------------------------------------------------------------------------------------------------------------------------------------------------------------------------------------------------------------------------------------------------------------------------------------------------------------------------------------------------------------------------------------------------------------------------------------------------------------------------------------------------------------------------------------------------------------------------------------------------------------------------------------------------------------------------------------------------------------------------------------------------------------------------------|
