# Supplementary material for: Utility of Antioxidants in the Treatment of Male Infertility: Clinical Guidelines Based on a Systematic Review and Analysis of Evidence
Source: PubMed Central journal article supplement — World J Mens Health. 2021 Jan 15;39(2):233–90. doi: 10.5534/wjmh.200196 (PMC7994666; doi:10.5534/wjmh.200196), 2021-01-15
Supplement: wjmh-39-233-s002.pdf [file wjmh-39-233-s002.pdf]

**Supplement Table 2.** Criteria for the classification of the controlled studies into low and high quality categories

---

|                       |                                        |                                                                         |
|-----------------------|----------------------------------------|-------------------------------------------------------------------------|
| Cochrane Risk of Bias | +1 point if no risk of bias identified | Studies were classified as high quality if the total score was $\geq 2$ |
| CONSORT guidelines    | +1 point if score $\geq 20$            |                                                                         |
| JADAD score           | +1 point if score $\geq 4$             |                                                                         |

---
