# Supplementary material for: Utility of Antioxidants in the Treatment of Male Infertility: Clinical Guidelines Based on a Systematic Review and Analysis of Evidence
Source: PubMed Central journal article supplement — World J Mens Health. 2021 Jan 15;39(2):233–90. doi: 10.5534/wjmh.200196 (PMC7994666; doi:10.5534/wjmh.200196), 2021-01-15
Supplement: wjmh-39-233-s003.pdf [file wjmh-39-233-s003.pdf]

**Supplement Table 3.** Criteria for the classification of the studies published between January 2019–July 2020 into low (total score <6) and high quality (total score ≥6)

| Criteria for quality evaluation                                | Variable                        | Score                                    |
|----------------------------------------------------------------|---------------------------------|------------------------------------------|
| Study design                                                   | RCT                             | +1 point                                 |
|                                                                | Double blinding trial           | +1 point                                 |
|                                                                | Placebo controlled trial        | +1 point                                 |
| Sample size analyzed                                           | Based on the median sample size | If higher: +1 point<br>If lower: 0 point |
|                                                                |                                 |                                          |
| Inclusion/exclusion criteria used for selecting the population | Strict male exclusion           | +1 point                                 |
|                                                                | Female factors investigation    | +1 point                                 |
| Antioxidant regimen used                                       | Single product                  | +1 point                                 |
|                                                                | Combination of several products | +1 point                                 |
| Length of treatment                                            | ≥3 months                       | +1 point                                 |
|                                                                | <3 months                       | 0 point                                  |
| Assessment of oxidative stress markers                         | Yes                             | +1 point                                 |
|                                                                | No                              | 0 point                                  |
| Assessment of pregnancy rate                                   | Yes                             | +1 point                                 |
|                                                                | No                              | 0 point                                  |
| Assessment of live birth rate                                  | Yes                             | +1 point                                 |
|                                                                | No                              | 0 point                                  |
| Maximum score                                                  |                                 | 12 points                                |

RCT: randomized controlled trial.
